# Supplementary material for: Host transcriptome alterations in vitro and in vivo following severe acute respiratory syndrome coronavirus 2 infection
Source: Research Square preprint supplement (doi:10.21203/rs.3.rs-37567/v2), 2021-04-15
Supplement: Supplementary file 1 [file 45dd36008857f2237b6c05fb.docx]

| Gene symbol | Gene name |
| --- | --- |
| AKAP12 | A-kinase anchoring protein 12 |
| ANGPTL4 | Angiopoietin like 4 |
| BCL2A1 | BCL2 related protein A1 |
| BCL2L1 | BCL2 like 1 |
| C1R | complement C1r |
| C1S | complement C1s |
| C3 | complement C3 |
| CCNB2 | cyclin B2 |
| COL12A1 | collagen type XII alpha 1 chain |
| CSF1 | colony stimulating factor 1 |
| DLGAP5 | DLG associated protein 5 |
| DUT | deoxyuridine triphosphatase |
| EMP1 | epithelial membrane protein 1 |
| EREG | epiregulin |
| ETS1 | ETS proto-oncogene 1, transcription factor |
| EZH2 | enhancer of zeste 2 polycomb repressive complex 2 subunit |
| HELZ2 | helicase with zinc finger 2 |
| HK2 | hexokinase 2 |
| HLA-B | major histocompatibility complex, class I, B |
| ICAM1 | intercellular adhesion molecule 1 |
| IER3 | immediate early response 3 |
| IFI27 | interferon alpha inducible protein 27 |
| IFI44L | interferon induced protein 44 like |
| IFNGR2 | interferon gamma receptor 2 |
| IL1B | interleukin 1 beta |
| IL6 | interleukin 6 |
| IRF7 | interferon regulatory factor 7 |
| ITGA5 | integrin subunit alpha 5 |
| ITGB3 | integrin subunit beta 3 |
| LAMP3 | lysosomal associated membrane protein 3 |
| LIF | LIF interleukin 6 family cytokine |
| LOX | lysyl oxidase |
| LTB | lymphotoxin beta |
| MCM4 | minichromosome maintenance complex component 4 |
| MYC | MYC proto-oncogene, bHLH transcription factor |
| NAMPT | nicotinamide phosphoribosyltransferase |
| OSMR | oncostatin M receptor |
| PARP14 | poly(ADP-ribose) polymerase family member 14 |
| PCNA | proliferating cell nuclear antigen |
| PDGFB | platelet derived growth factor subunit B |
| PLAUR | plasminogen activator, urokinase receptor |
| POLD3 | DNA polymerase delta 3, accessory subunit |
| PTGS2 | prostaglandin-endoperoxide synthase 2 |
| PTTG1 | PTTG1 regulator of sister chromatid separation, securin |
| RFC3 | replication factor C subunit 3 |
| RPA2 | replication protein A2 |
| SERPINA3 | serpin family A member 3 |
| SLC39A8 | solute carrier family 39 member 8 |
| SOD2 | superoxide dismutase 2 |
| TAP1 | transporter 1, ATP binding cassette subfamily B member |
| TGM2 | transglutaminase 2 |
| TLR2 | toll like receptor 2 |
| TNF | tumor necrosis factor |
| TNFAIP3 | TNF alpha induced protein 3 |
| TRIM25 | tripartite motif containing 25 |
| VEGFA | vascular endothelial growth factor A |

Table S1 The co-core genes from the co-enriched GSEA results.
